# Supplementary material for: MicroRNA-5195-3p mediated malignant biological behaviour of insulin-resistant liver cancer cells via SOX9 and TPM4
Source: PubMed Central journal article supplement (PMC10273698; doi:10.1186/s12885-023-11068-x), 2023-06-16
Supplement: 12885_2023_11068_MOESM1_ESM.pdf [file 12885_2023_11068_MOESM1_ESM.pdf]

Three gels

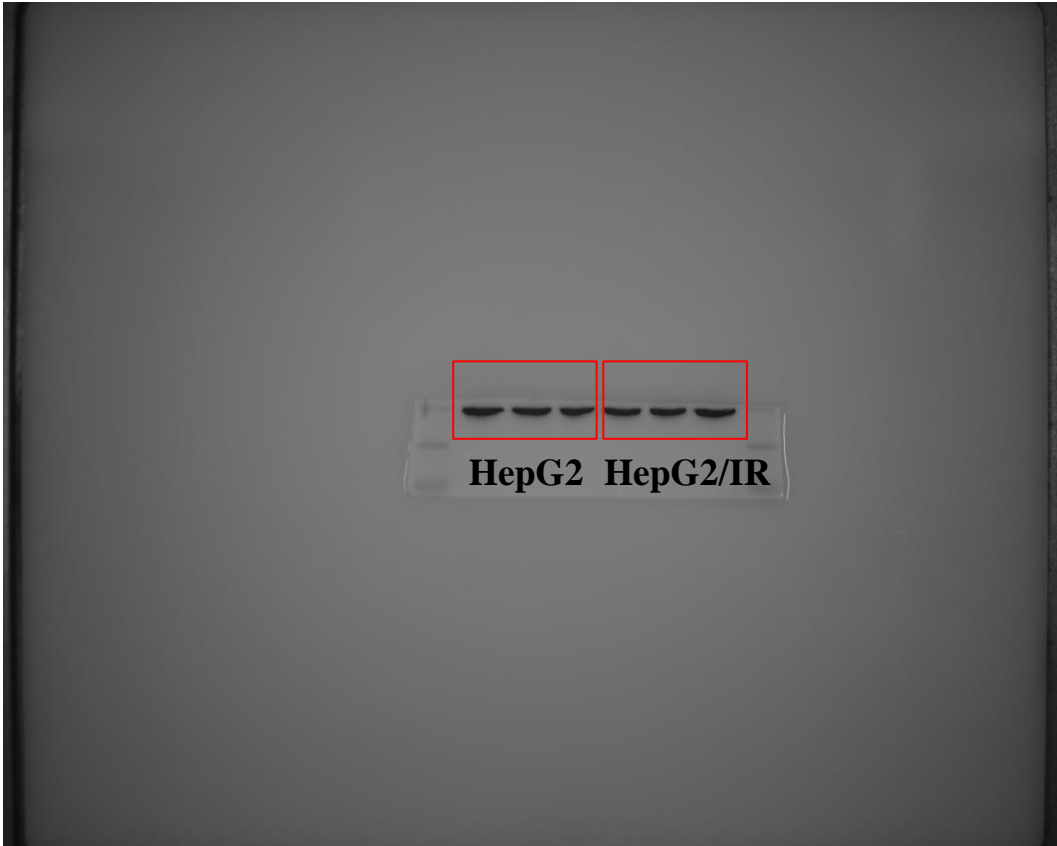

$\beta$ -actin

Three gels

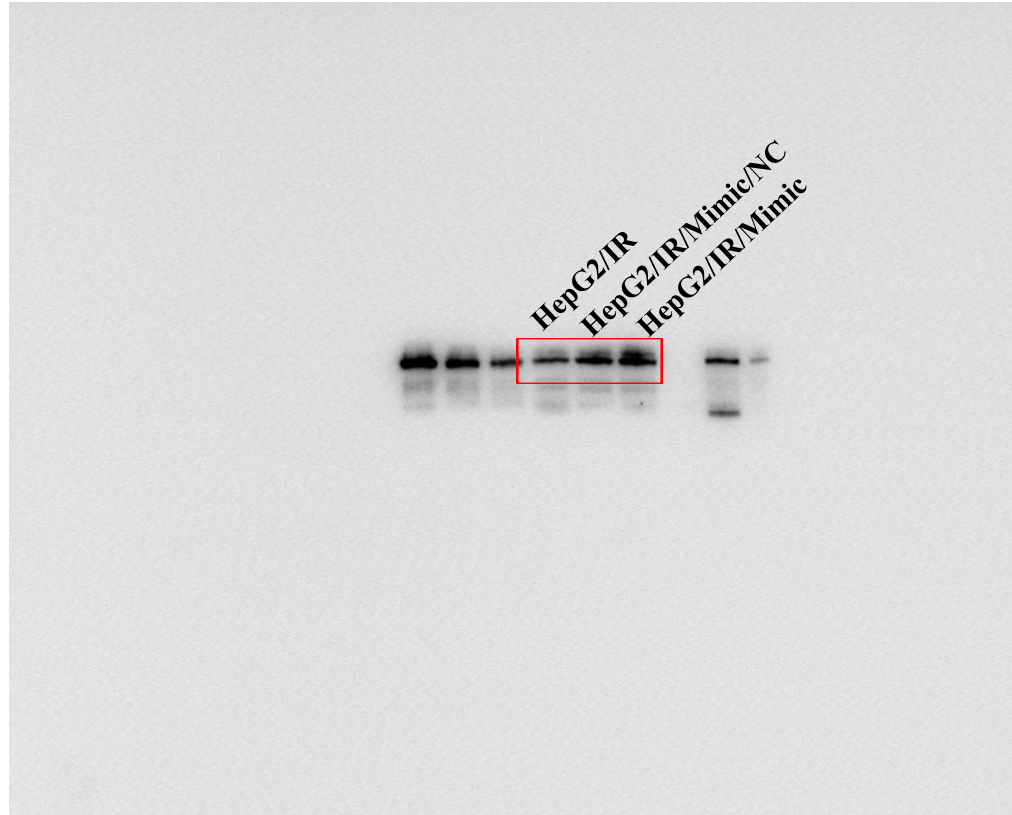

**E-cadherin**

Three gels

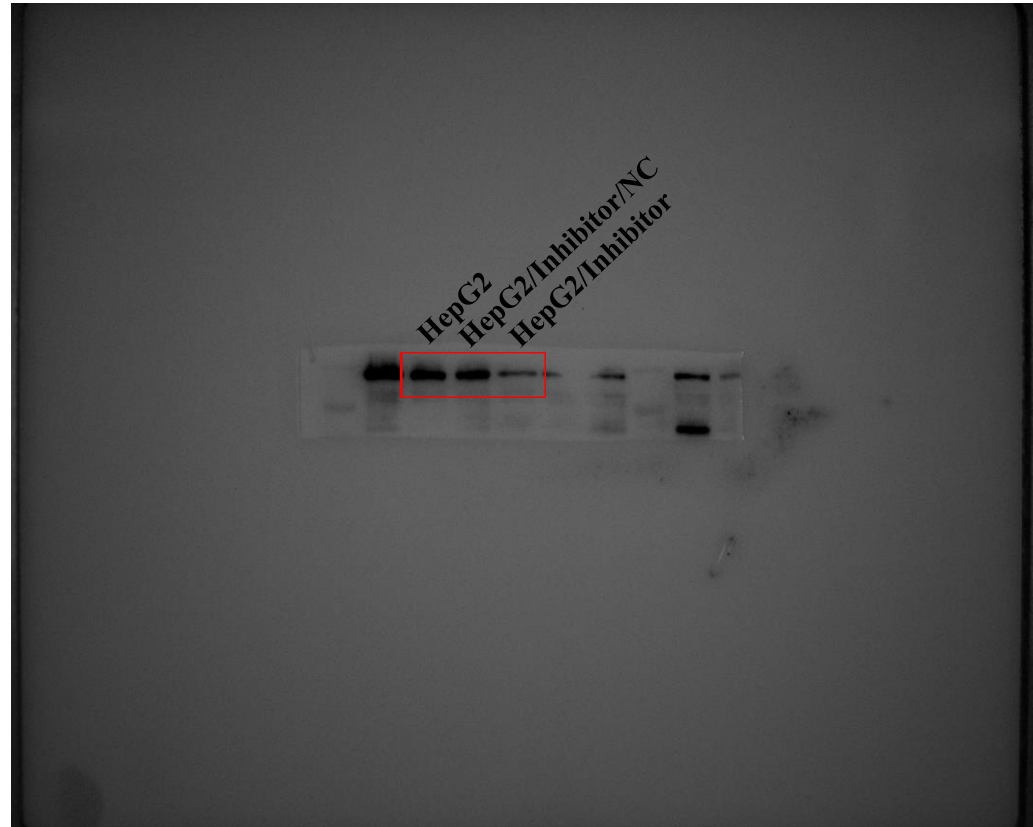

**E-cadherin**

Six gels

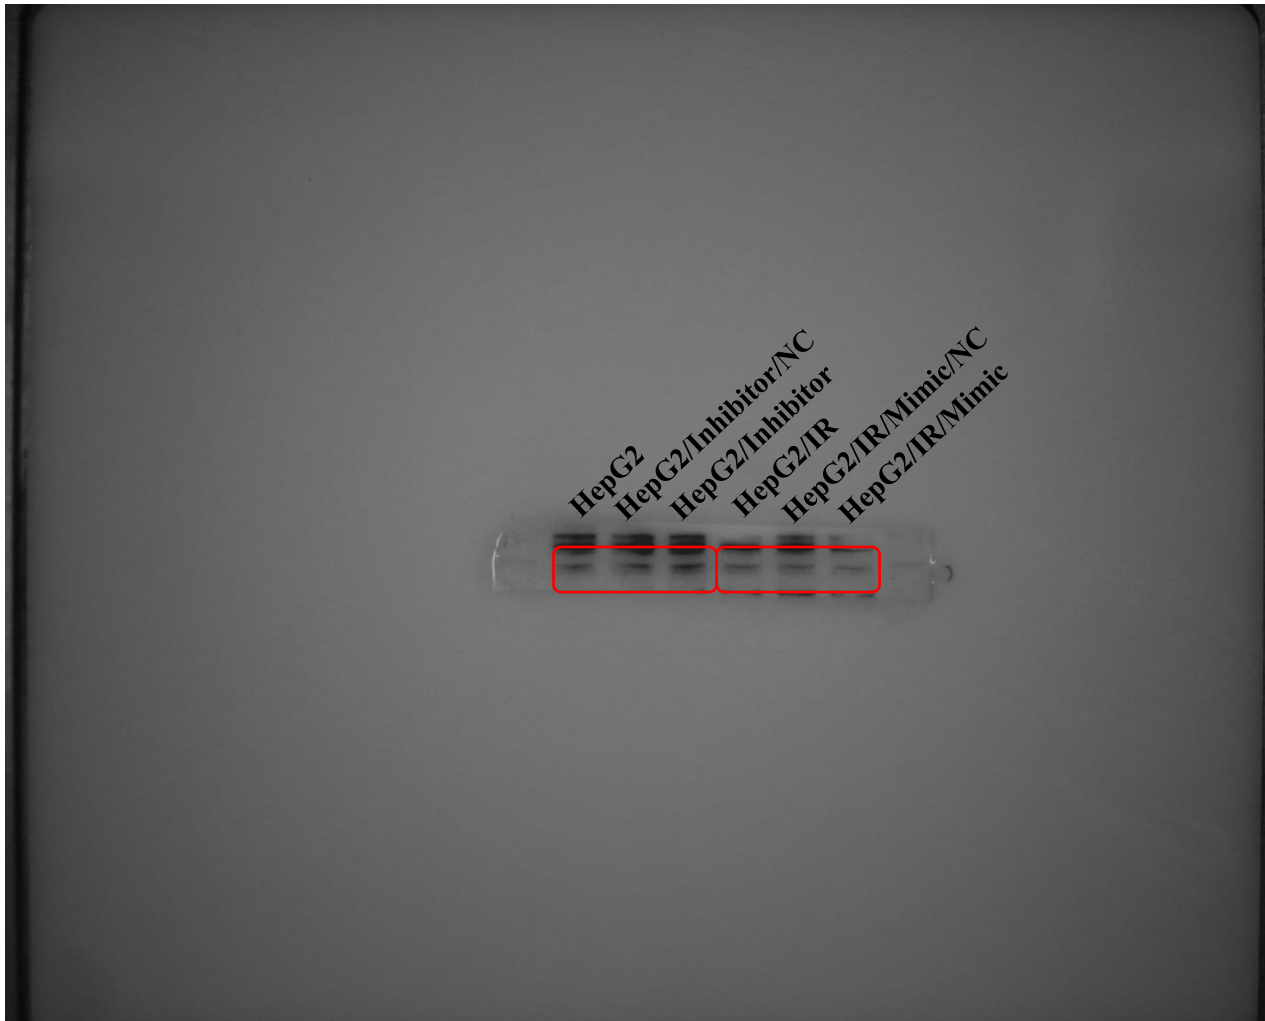

**N-cadherin**

Three gels

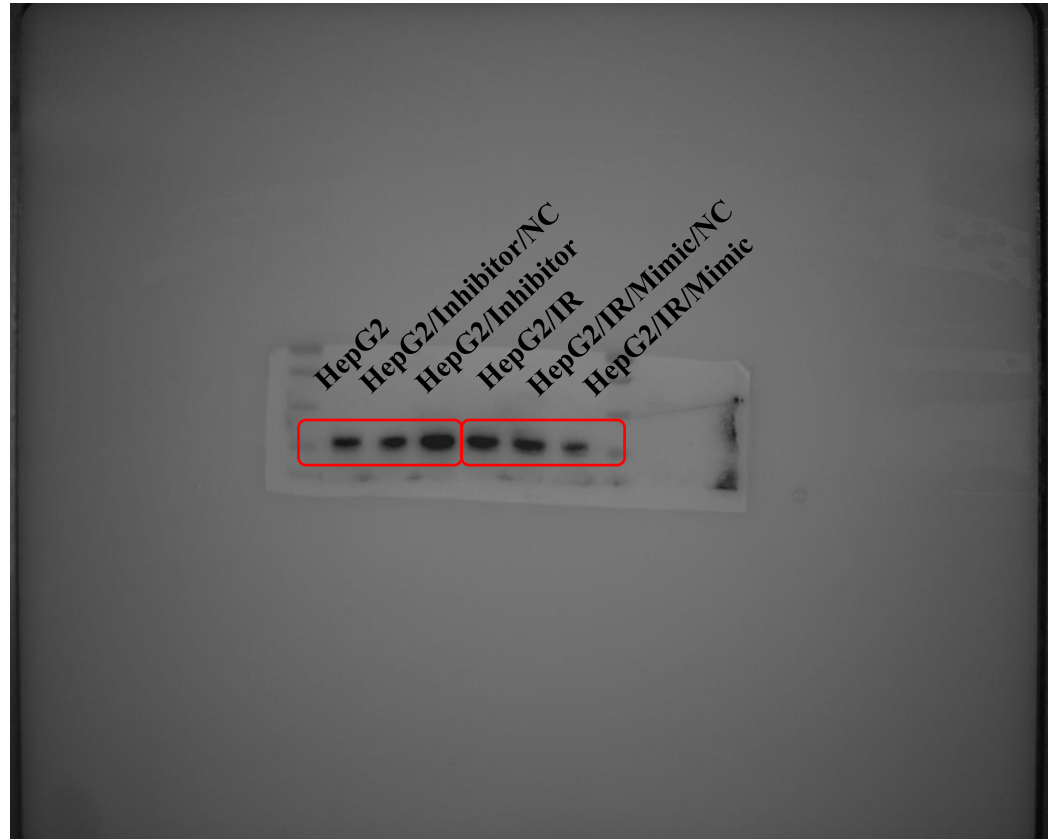

Snail

Three gels

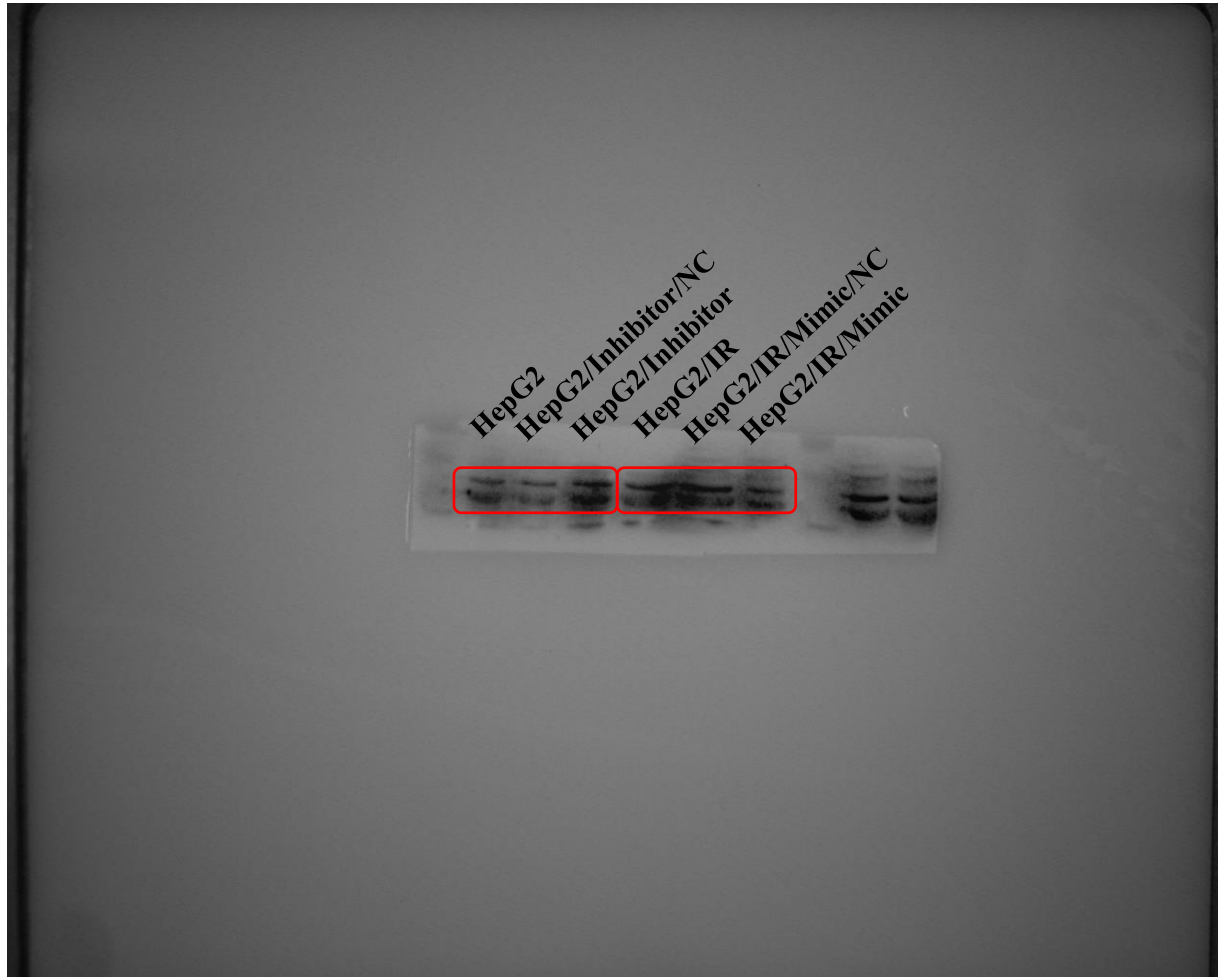

**Vimentin**

Three gels

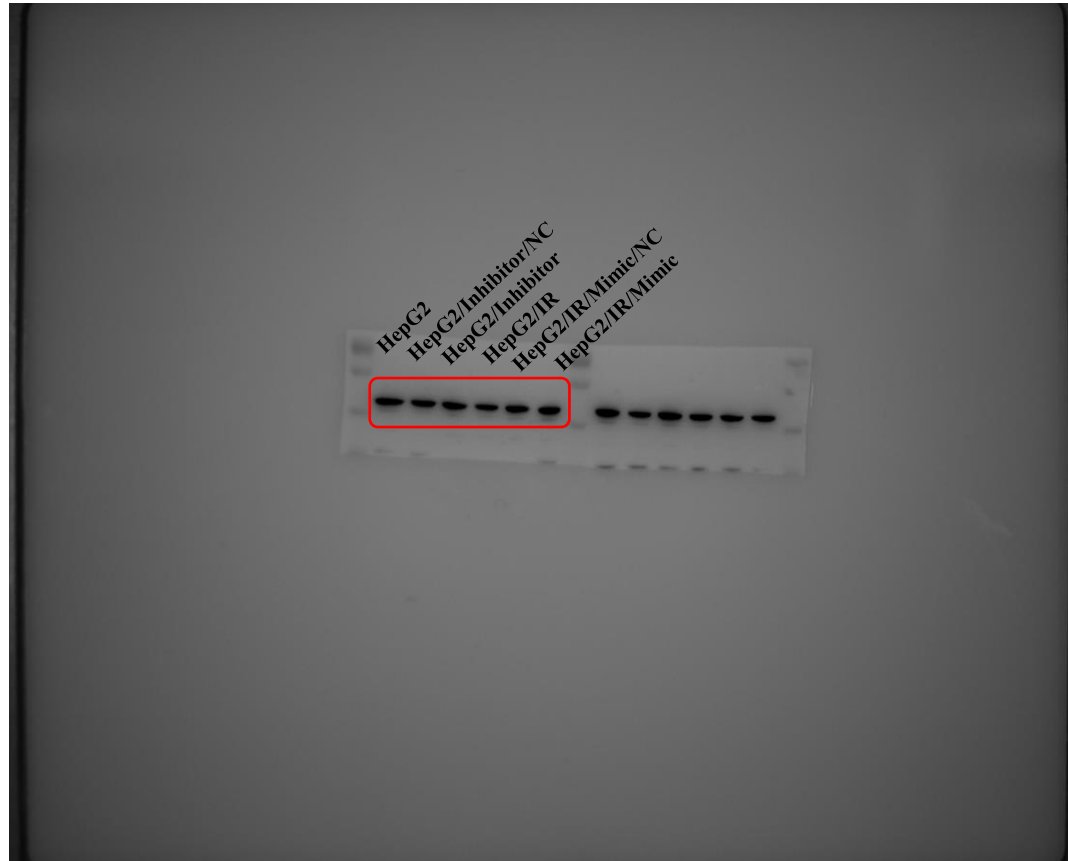

$\beta$ -actin

## Three gels

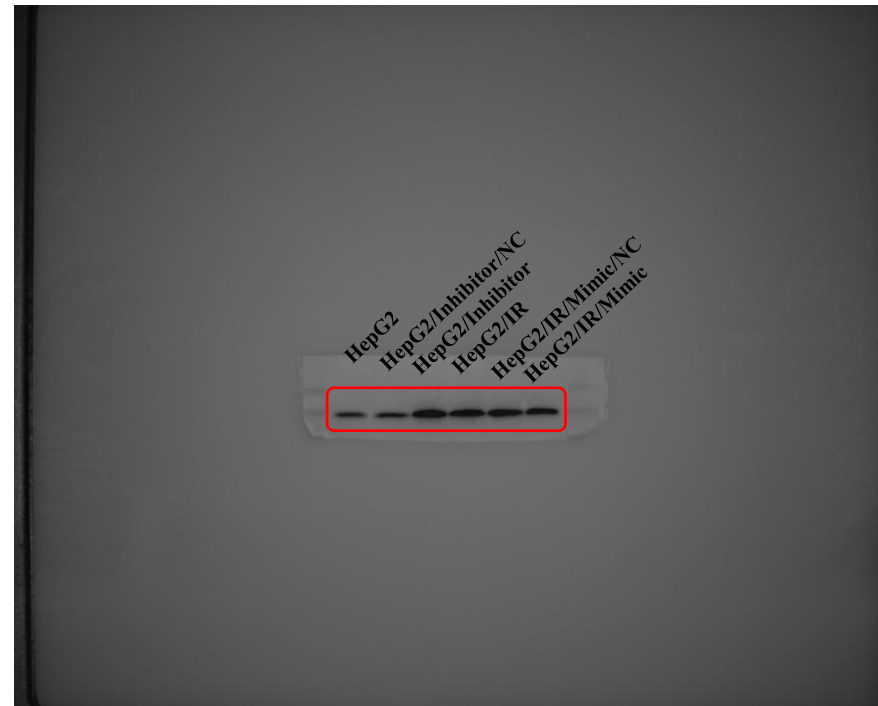

**TPM4**



Three gels

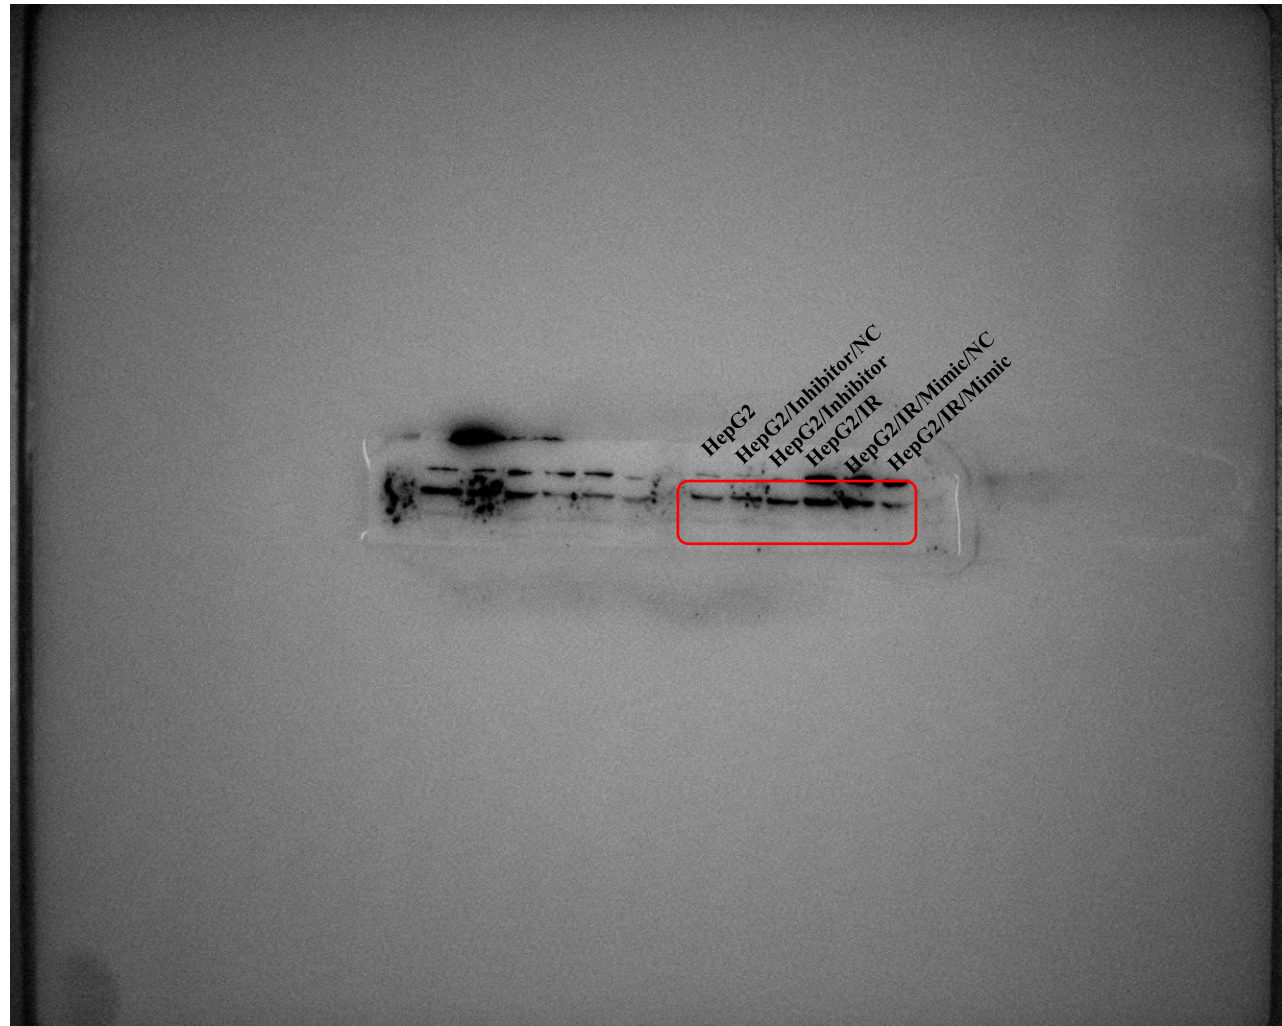

**SOX9**

Two gels

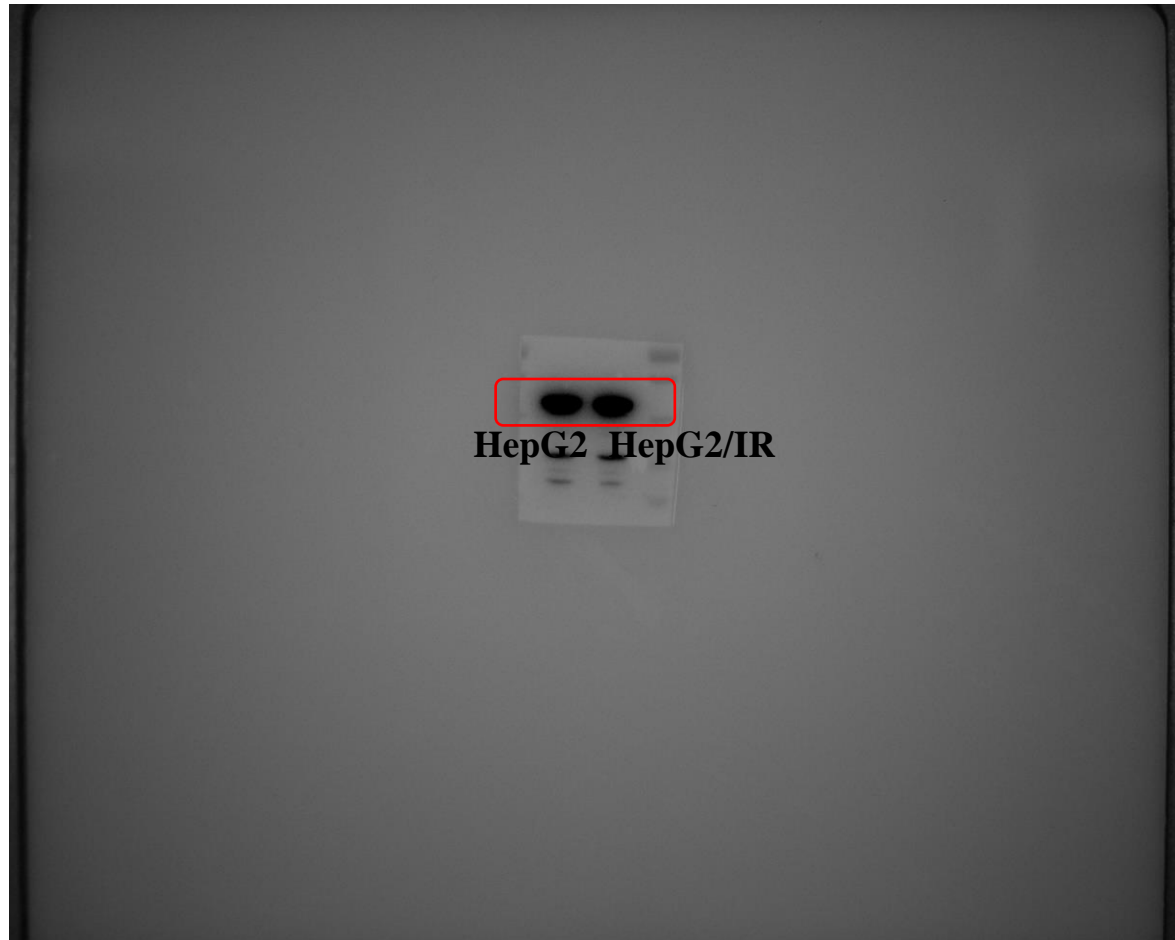

$\beta$ -actin

**Two gels**

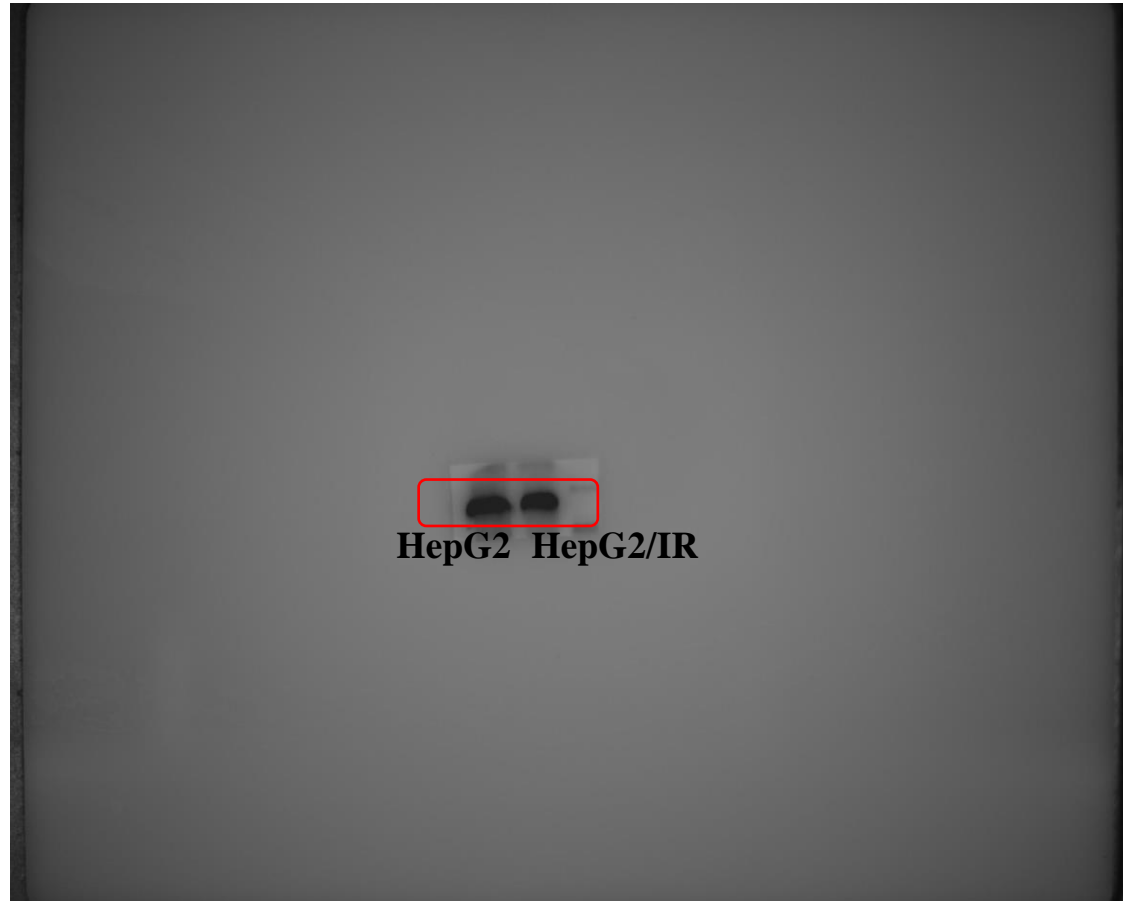

**HepG2 HepG2/IR**

**E-cadherin**

Two gels

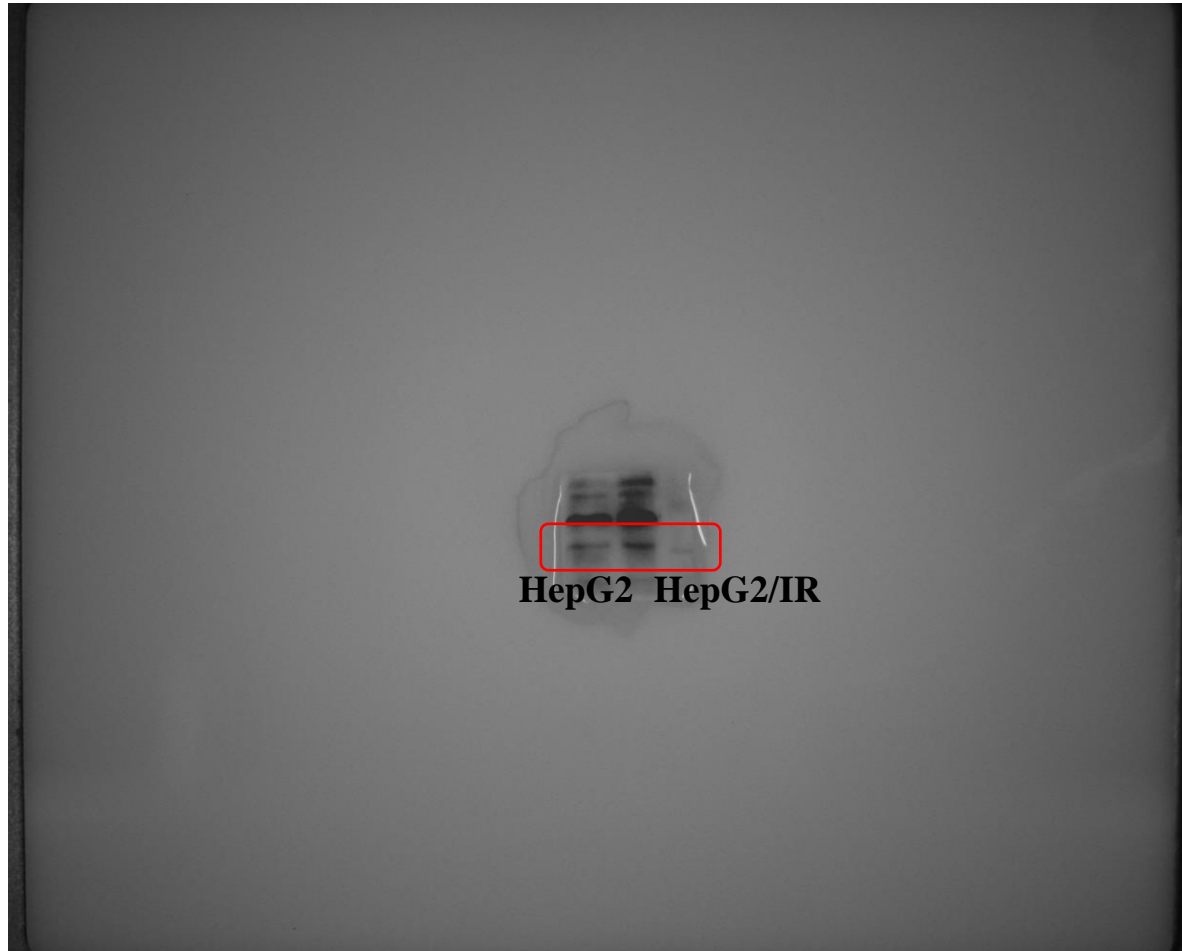

HepG2 HepG2/IR

N-cadherin

Two gels

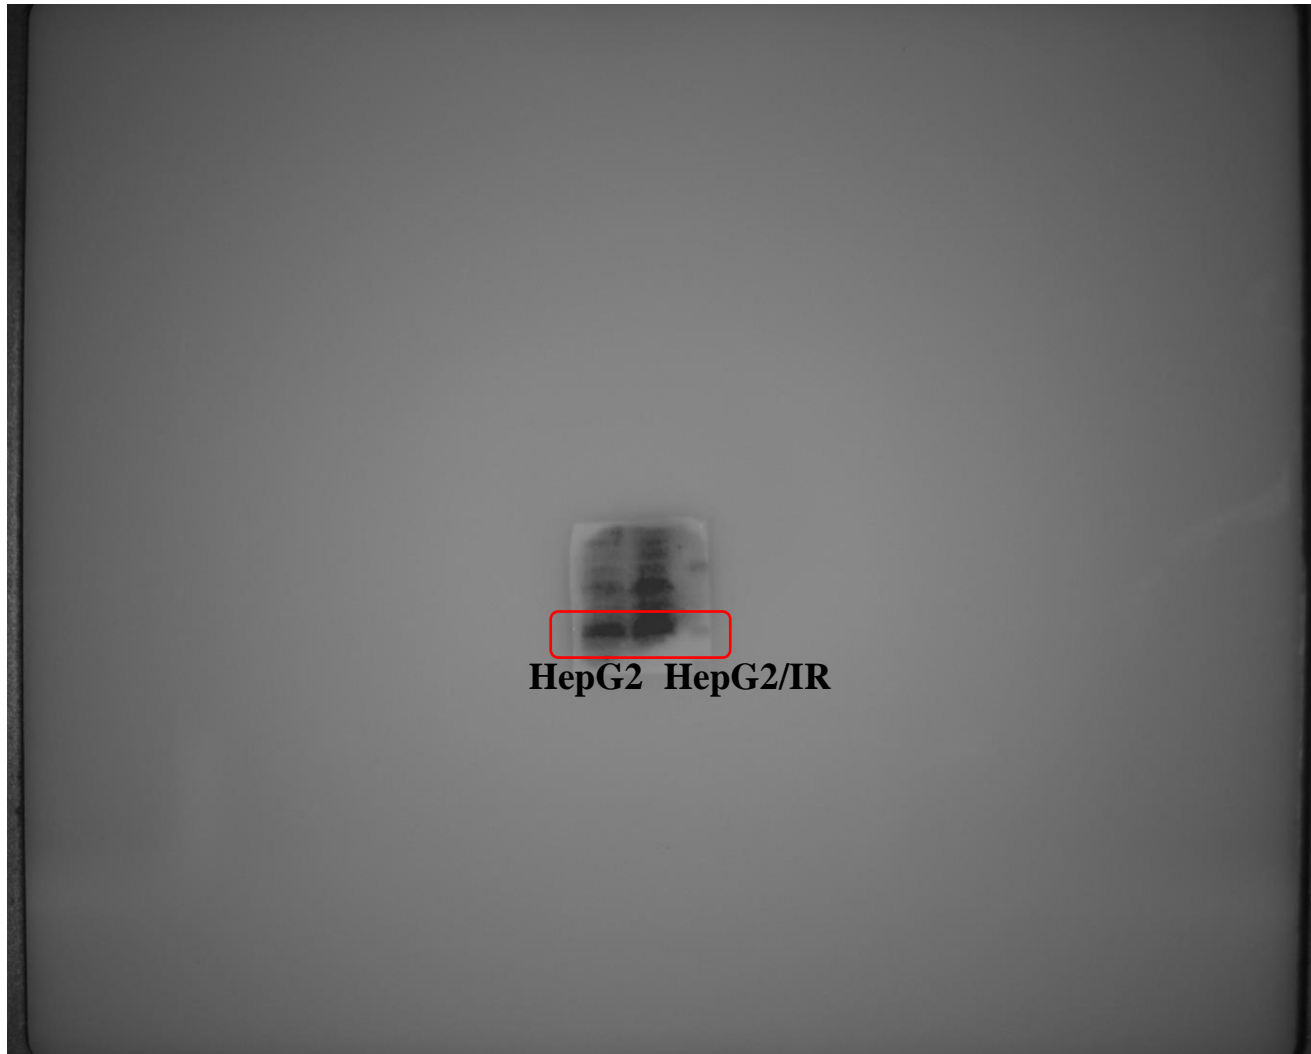

Vimentin

Two gels

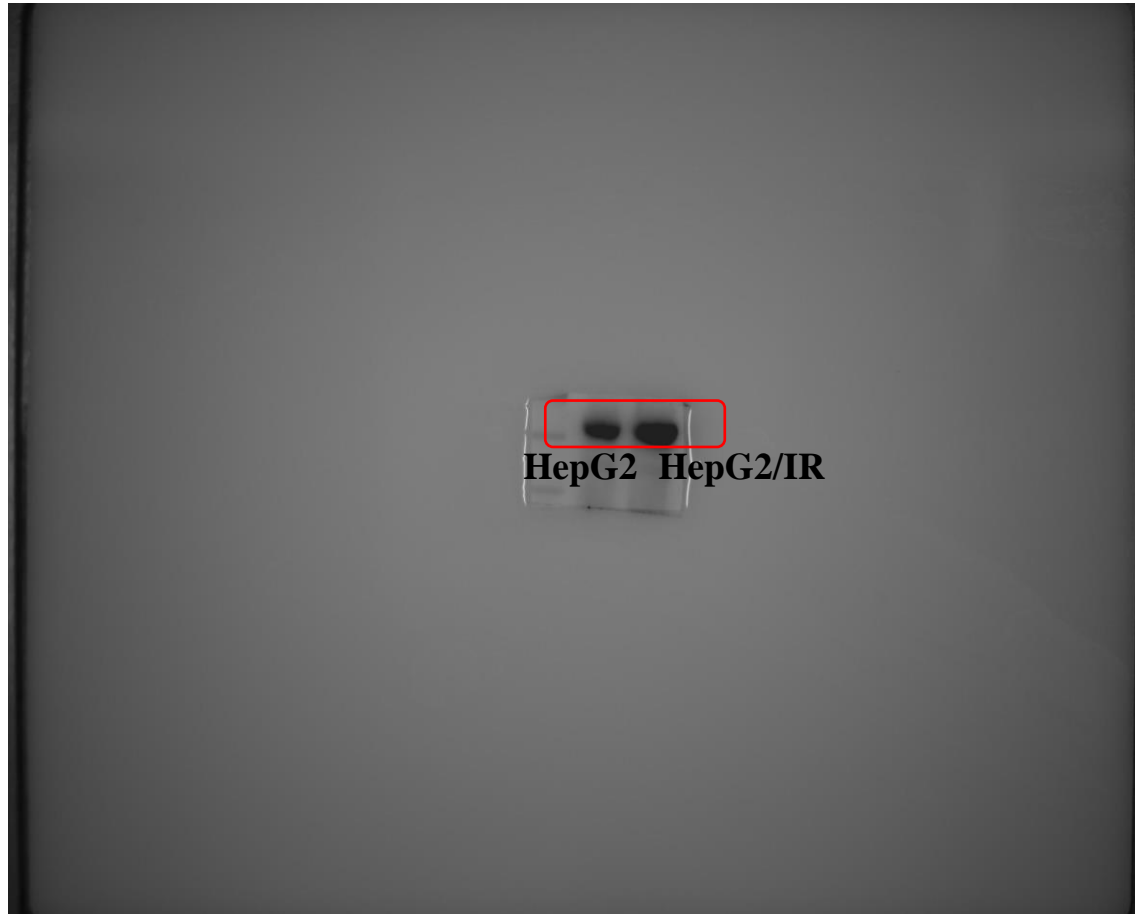

Snail
